# Supplementary material for: Targeting activating mutations of EZH2 leads to potent cell growth inhibition in human melanoma by derepression of tumor suppressor genes
Source: PubMed Central journal article supplement (PMC4694971; doi:10.18632/oncotarget.4809), 2015-08-12
Supplement: oncotarget-06-27023-s001.pdf [file oncotarget-06-27023-s001.pdf]

SUPPLEMENTARY FIGURES AND TABLES

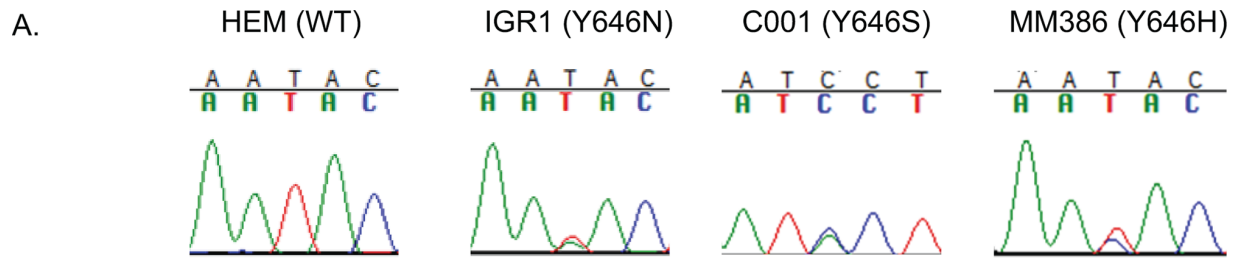

B.

| Cell Line | Nucleotide change | Protein change | BRAF    | CDKN2A         | p14ARF | CDK4 | NRAS | PTEN | p53                                                |
|-----------|-------------------|----------------|---------|----------------|--------|------|------|------|----------------------------------------------------|
| IGR1      | TAC>AAC           | Y646N          | V600E/M | -              | -      | -    | -    | -    | -                                                  |
| C001      | TAC>TCC           | Y646S          | WT      | WT             | WT     | WT   | Q61K | WT   | E258_S261del (EDSS),<br>771_782delGGAAGACTC<br>CAG |
| MM386     | TAC>CAC           | Y646H          | V600E   | WT(methylated) | WT     | WT   | WT   | HD   | WT                                                 |

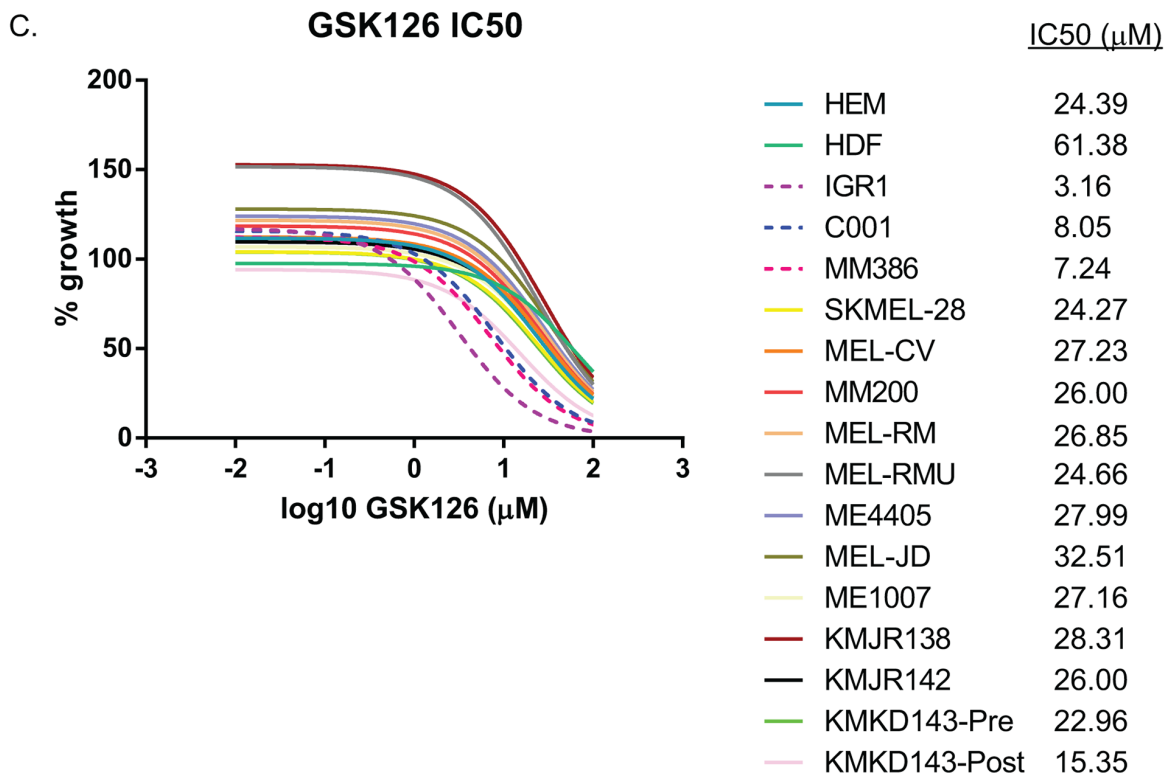

Supplementary Figure S1: Mutation status and IC50 values of cell lines. Sequencing traces of EZH2<sup>Y646</sup> mutant cell lines identified by Sanger sequencing. A. Mutational status of EZH2<sup>Y646</sup> cell lines B. IC50 values of GSK126 against the cell panel C.

A.

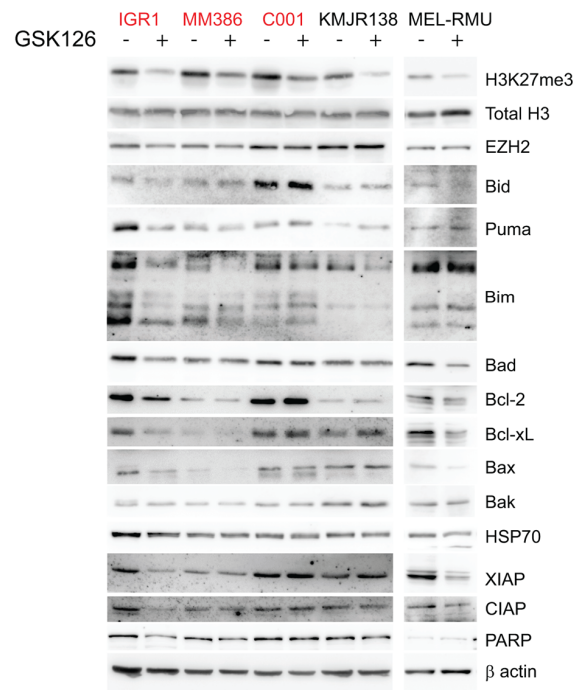

B.

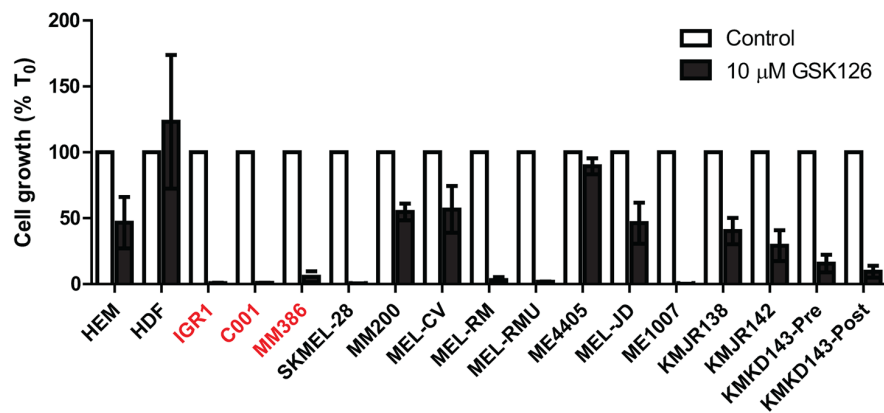

C.

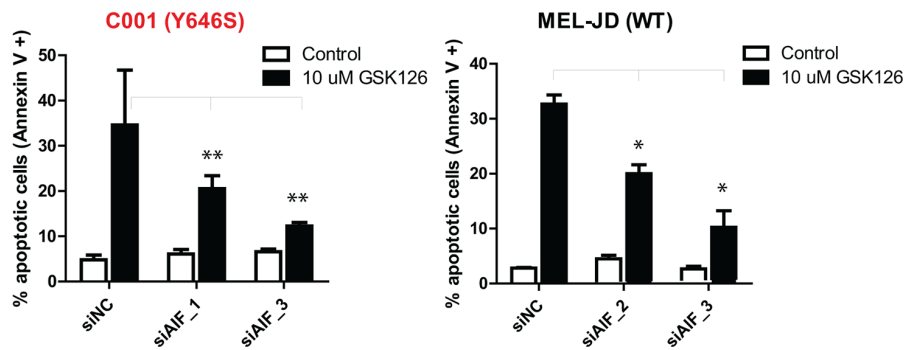

**Supplementary Figure S2: Apoptosis screen, Day 8 proliferation values and AIFM1 knockdown in additional cell lines.** Western blot of mutant EZH2<sup>Y646</sup> cell lines (highlighted in red) and WT cells treated with 7.5 μM GSK126 for 48 hr. **A.** Day 8 proliferation values in cell panel treated with GSK126 normalized to control values at 100% **B.** siRNA knockdown of AIFM1 in EZH2<sup>Y646</sup> mutant (C001) or EZH2 WT (MEL-JD) was able to prevent GSK126 mediated apoptosis **C.** Mutants are indicated in red.

A.

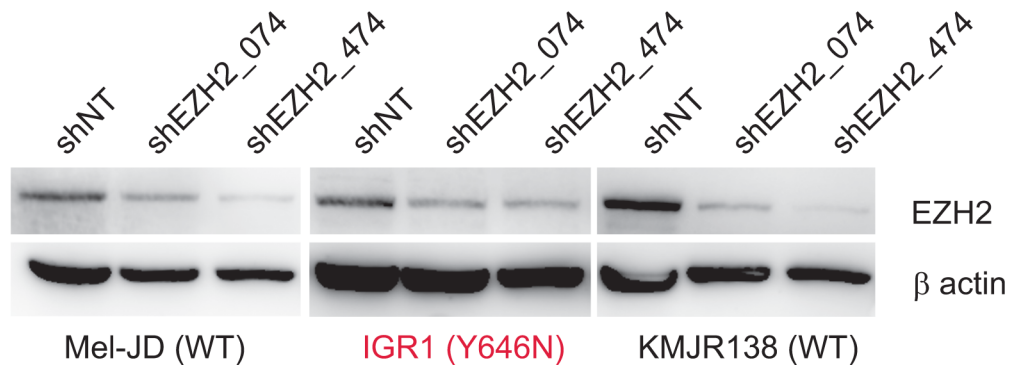

B.

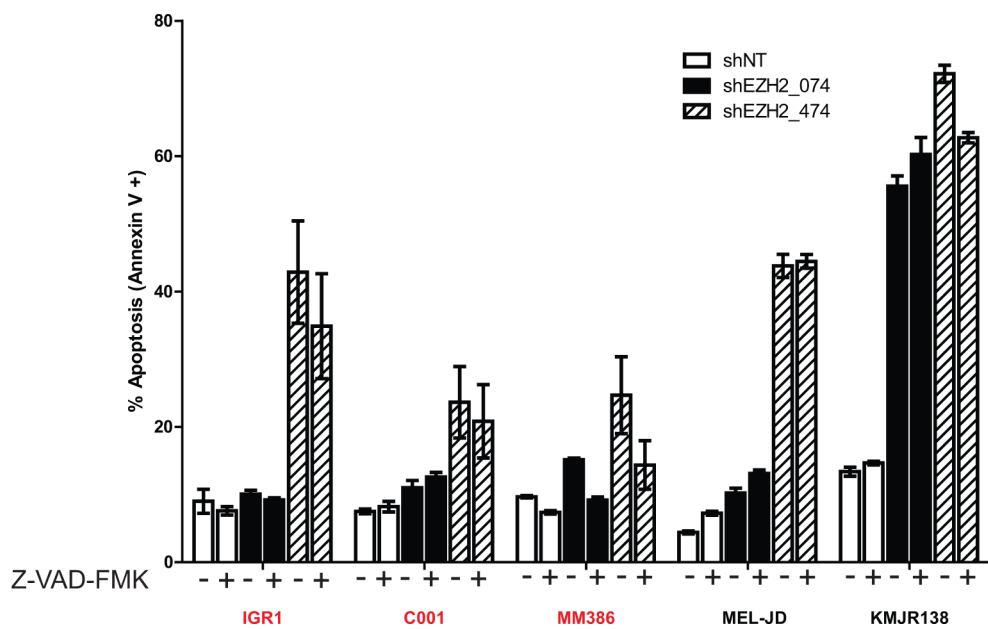

**Supplementary Figure S3: EZH2 knockdown and caspase inhibition.** Western blot showing knockdown of EZH2 in multiple cell lines using two individual shRNA lentiviral vectors 6 days after transfection including 4 days of puromycin selection. **A.** Pan caspase inhibition in EZH2 knockdown cells 24 hr after transduction was unable to prevent cell death **B.** as in drug treated cells ( $n = 2$ ). Cells in (B) were not preselected with puromycin as Z-VAD-FMK is known to prevent puromycin cell death. Mutants are indicated in red.

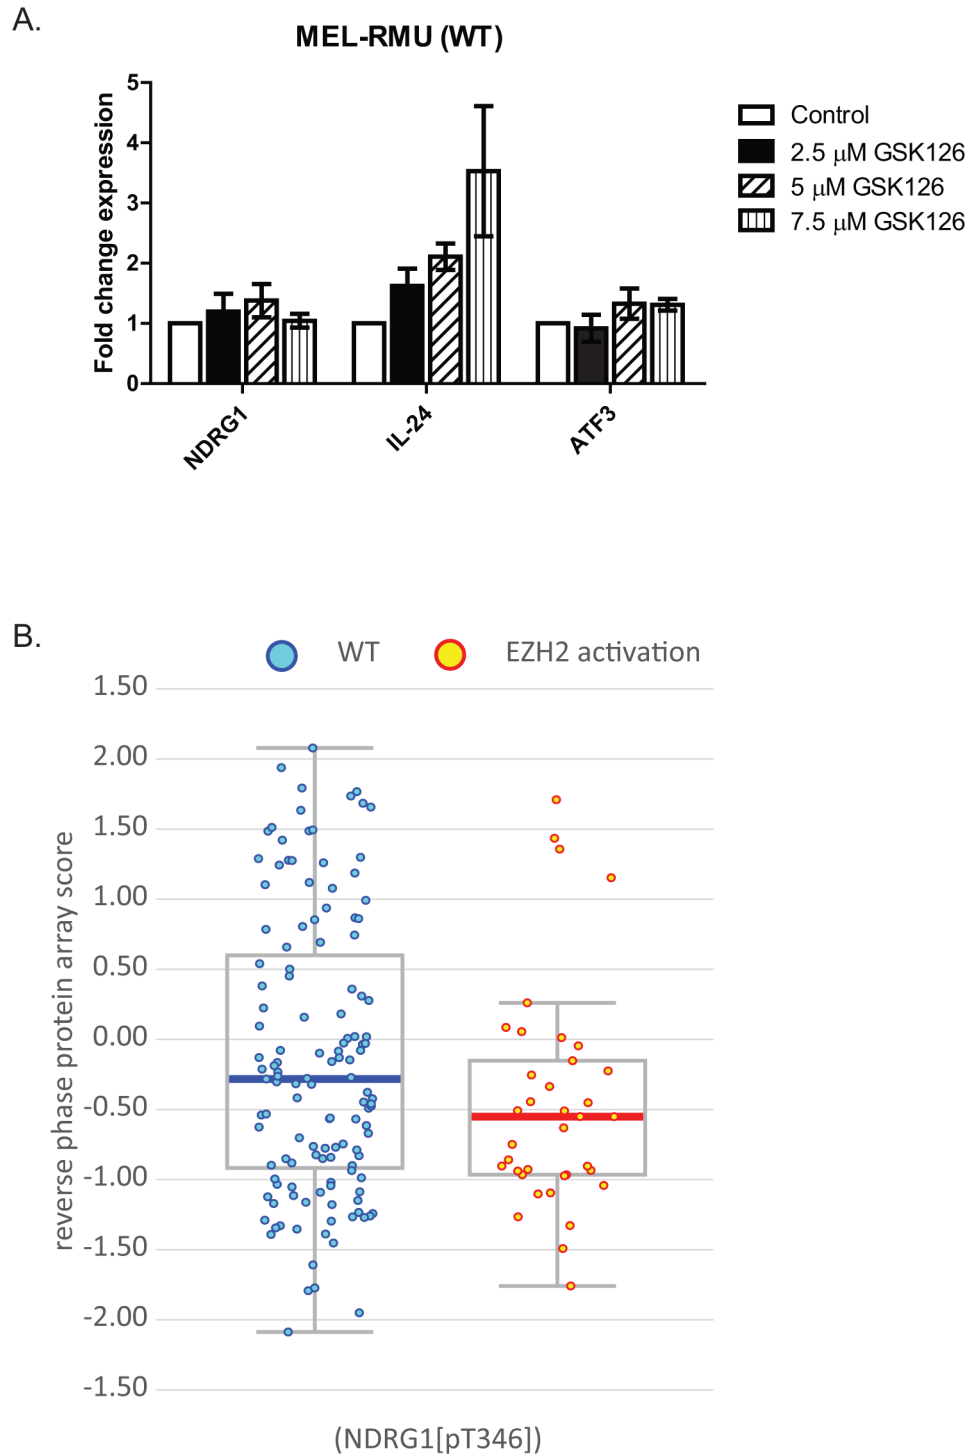

**Supplementary Figure S4: Target validation in WT cells and NDRG1\_pT346 RPPA data.** RT-qPCR of microarray targets in EZH2 wildtype MEL-RMU. **A.** cells treated for 48 hr with different doses of GSK126. Reverse phase protein array (RPPA) data **B.** for NDRG1\_pT346 in melanoma patients from TCGA with WT or EZH2 activation (somatic mutations, amplification or mRNA upregulation).

**Supplementary Table S1: RT-PCR Primers used in this study**

| Gene of Interest | Forward Primer             | Reverse Primer          | Location relative to transcription start site |
|------------------|----------------------------|-------------------------|-----------------------------------------------|
| ATF3 (A)         | CTACAGTCACCTTGCGGTGC       | GAGGCTGGGAAGGGTAATGG    | -10152 to -10041                              |
| ATF3 (B)         | CCCTCCACTTCATGGCACTG       | GTCTTTGCCACAGGAGAGTGATC | -2670 to -2539                                |
| ATF3 (C)         | GACACCTCTAGTTTCTACCCCAAATT | ACGGTGAAGGGCAGAAACAC    | -1453 to -1354                                |
| ATF3 (D)         | CTTCCTCTTTCAGGACTGTTTG     | GGATGATGTTTCAGGCTACTCTG | 6018 to 6115                                  |
| CCND2            | TAGGATCCGTTTTGAAGAAGCC     | CATTCTGTAGGTGTAGCACGCC  | -337 to -273                                  |
| CDC6             | GATTCCCTCCCCCGTTCA         | CAATGAGAGAGCCCCAAGTCTT  | 60 to 124                                     |

NB ATF3 transcript NCBI refseq NM\_001674

**Supplementary Table S2: Antibodies used in this study**

| Antibody        | Catalogue number | Manufacturer              |
|-----------------|------------------|---------------------------|
| EZH2            | 5246             | Cell Signaling Technology |
| B-actin         | AC-74            | Sigma                     |
| H3K27me3        | 61017            | Active Motif              |
| Total Histone 3 | ab1791           | AbCam                     |
| AIF             | sc-5586          | Santa Cruz                |
| NDRG1_pT346     | 3217             | Cell Signaling Technology |
| p53             | sc-126           | Santa Cruz                |
| Bim             | C34C5            | Cell Signaling Technology |
| Noxa            | 114C307.1        | Imgenex                   |
| Mcl-1           | 559027           | BD Bioscience             |
| Bid             | 2002S            | Cell Signaling Technology |
| Puma            | 4976             | Cell Signaling Technology |
| Bad             | 610392           | BD Bioscience             |
| Bcl-2           | C-2, sc-7382     | Santa Cruz                |
| Bcl-xL          | H-5, sc-8392     | Santa Cruz                |
| Bax             | 2772             | Cell Signaling Technology |
| Bak             | G-23, sc-832     | BD Bioscience             |
| HSP70           | 4872             | Cell Signaling Technology |
| XIAP            | 610716           | BD Bioscience             |
| CIAP            | AF 8181          | R&D                       |
| PARP            | F-2, sc-8007     | Santa Cruz                |
| MDM2            | H-221            | Santa Cruz                |
